# Supplementary material
Source: publisher site journal article supplement (https://www.dovepress.com/article/393084)
Supplement: Supplementary file 1 [file get_supplementary_file.php]

**Supplementary Table 1: *In Silico* prediction of the ADME profiles of potential SARS-CoV-2 main protease inhibitors from *Thymus schimperi***

| **No** | **Compound CID** | **Common name** | **Structure** | **Water solubility** | **GI absorption** | **BBB permeant** | **Bioavailability score** | **Synthetic accessibility** |
| --- | --- | --- | --- | --- | --- | --- | --- | --- |
| 1 | [13357](https://pubchem.ncbi.nlm.nih.gov/compound/13357) | Butanoic acid | 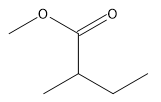 | Very soluble | High | Yes | 0.55 | 1.32 |
| 2 | [17868](https://pubchem.ncbi.nlm.nih.gov/compound/17868) | Thujene alpha | 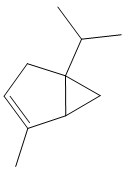 | Soluble | Low | Yes | 0.55 | 3.99 |
| 3 | [123737810](https://pubchem.ncbi.nlm.nih.gov/compound/123737810) | Pinene alpha | 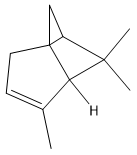 | Soluble | Low | Yes | 0.55 | 4.81 |
| 4 | [561243](https://pubchem.ncbi.nlm.nih.gov/compound/561243) | 7-Ethylcycloheptatriene | 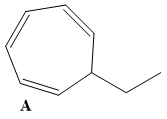 | Soluble | Low | Yes | 0.55 | 3.82 |
| 5 | 6616 | Camphene | 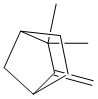 | Soluble | Low | Yes | 0.55 | 3.50 |
| 6 | [123730774](https://pubchem.ncbi.nlm.nih.gov/compound/123730774) | Pinene beta | 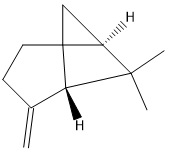 | Soluble | Low | Yes | 0.55 | 3.78 |
| 7 | [137888](https://pubchem.ncbi.nlm.nih.gov/compound/137888) | Flourazophore P | 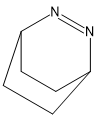 | Very soluble | High | Yes | 0.55 | 3.83 |
| 8 | [12473722](https://pubchem.ncbi.nlm.nih.gov/compound/12473722) | 3-Octane | 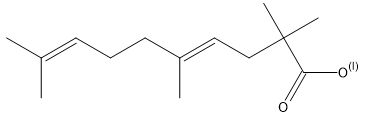 | Soluble | High | Yes | 0.85 | 2.95 |
| 9 | [31253](https://pubchem.ncbi.nlm.nih.gov/compound/31253) | [Myrcene](https://pubchem.ncbi.nlm.nih.gov/compound/31253) | 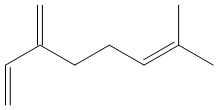 | Soluble | Low | Yes | 0.55 | 2.85 |
| 10 | [7460](https://pubchem.ncbi.nlm.nih.gov/compound/7460) | [Alpha-phellandrene](https://pubchem.ncbi.nlm.nih.gov/compound/7460) | 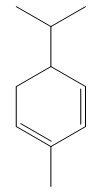 | Soluble | Low | Yes | 0.55 | 4.15 |
| 11 | [26049](https://pubchem.ncbi.nlm.nih.gov/compound/26049) | 3-Carene | 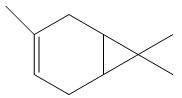 | Soluble | Low | Yes | 0.55 | 3.84 |
| 12 | [10703](https://pubchem.ncbi.nlm.nih.gov/compound/10703) | [O-Cymene](https://pubchem.ncbi.nlm.nih.gov/compound/10703) | 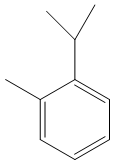 | Soluble | Low | Yes | 0.55 | 1.00 |
| 13 | [22311](https://pubchem.ncbi.nlm.nih.gov/compound/22311) | [Limonene](https://pubchem.ncbi.nlm.nih.gov/compound/22311) | 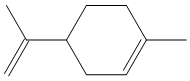 | Soluble | Low | Yes | 0.55 | 3.46 |
| 14 | [2758](https://pubchem.ncbi.nlm.nih.gov/compound/2758) | Eucalyptol | 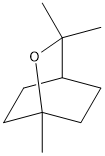 | Soluble | High | Yes | 0.55 | 3.65 |
| 15 | [142246827](https://pubchem.ncbi.nlm.nih.gov/compound/142246827) | Ocimene (Z) | 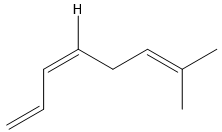 | Soluble | Low | Yes | 0.55 | 3.54 |
| 16 | [7462](https://pubchem.ncbi.nlm.nih.gov/compound/7462) | [Alpha-Terpinene](https://pubchem.ncbi.nlm.nih.gov/compound/7462) | 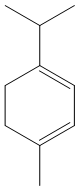 | Soluble | Low | Yes | 0.55 | 3.63 |
| 17 | [7461](https://pubchem.ncbi.nlm.nih.gov/compound/7461) | [Gamma-Terpinene](https://pubchem.ncbi.nlm.nih.gov/compound/7462) | 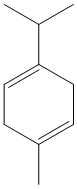 | Soluble | Low | Yes | 0.55 | 3.11 |
| 18 | [10975](https://pubchem.ncbi.nlm.nih.gov/compound/10975) | [Myrcenol](https://pubchem.ncbi.nlm.nih.gov/compound/10975) | 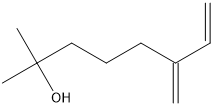 | Soluble | High | Yes | 0.55 | 2.20 |
| 19 | [11463](https://pubchem.ncbi.nlm.nih.gov/compound/11463) | Terpinolene | 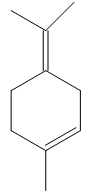 | Soluble | Low | Yes | 0.55 | 2.98 |
| 20 | [6549](https://pubchem.ncbi.nlm.nih.gov/compound/6549) | [Linalool](https://pubchem.ncbi.nlm.nih.gov/compound/6549) | 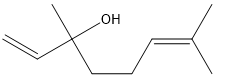 | Soluble | High | Yes | 0.55 | 2.74 |
| 21 | [527426](https://pubchem.ncbi.nlm.nih.gov/compound/527426) | [Dehydrosabinaketone](https://pubchem.ncbi.nlm.nih.gov/compound/527426) | 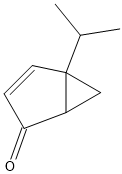 | Very soluble | High | Yes | 0.55 | 3.70 |
| 22 | [1252759](https://pubchem.ncbi.nlm.nih.gov/compound/1252759) | [Alpha-Campholenal](https://pubchem.ncbi.nlm.nih.gov/compound/1252759) | 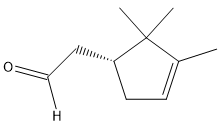 | Very soluble | High | Yes | 0.55 | 3.33 |
| 23 | [5368821](https://pubchem.ncbi.nlm.nih.gov/compound/5368821) | [Alloocimene](https://pubchem.ncbi.nlm.nih.gov/compound/5368821) | 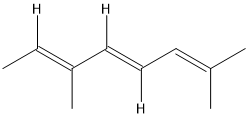 | Soluble | Low | Yes | 0.55 | 4.00 |
| 24 | [45095936](https://pubchem.ncbi.nlm.nih.gov/compound/45095936) | Sabinol trans | 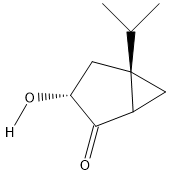 | Very soluble | High | Yes | 0.55 | 2.71 |
| 25 | [64685](https://pubchem.ncbi.nlm.nih.gov/compound/64685) | [Isoborneol](https://pubchem.ncbi.nlm.nih.gov/compound/64685) | 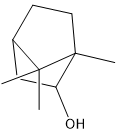 | Soluble | High | Yes | 0.55 | 3.43 |
| 26 | [110952](https://pubchem.ncbi.nlm.nih.gov/compound/110952) | [1-(3-Methylphenyl)Ethanol](https://pubchem.ncbi.nlm.nih.gov/compound/110952) | 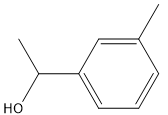 | Soluble | High | Yes | 0.55 | 1.23 |
| 27 | [442501](https://pubchem.ncbi.nlm.nih.gov/compound/442501) | [(+)-Alpha-Terpineol](https://pubchem.ncbi.nlm.nih.gov/compound/442501) | 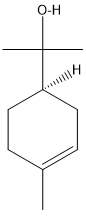 | Soluble | High | Yes | 0.55 | 3.24 |
| 28 | [556287](https://pubchem.ncbi.nlm.nih.gov/compound/556287) | [Cyclohexane](https://pubchem.ncbi.nlm.nih.gov/compound/556287) | 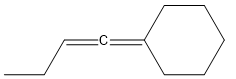 | Soluble | Low | Yes | 0.55 | 2.91 |
| 29 | [573025](https://pubchem.ncbi.nlm.nih.gov/compound/573025) | [2-Isobutylideneamino-3-Methylbutyronitrile](https://pubchem.ncbi.nlm.nih.gov/compound/573025) | 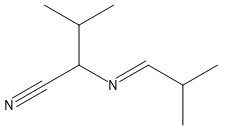 | Soluble | High | Yes | 0.55 | 3.10 |
| 30 | [8182](https://pubchem.ncbi.nlm.nih.gov/compound/8182) | dodecane | 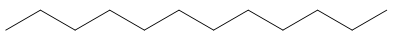 | Moderately soluble | Low | No | 0.55 | 1.83 |
| 31 | [443183](https://pubchem.ncbi.nlm.nih.gov/compound/443183) | (1S,4S)-Dihydrocarvone | 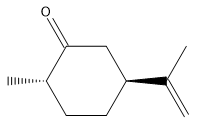 | Soluble | High | Yes | 0.55 | 2.75 |
| 32 | [564375](https://pubchem.ncbi.nlm.nih.gov/compound/564375) | [3,5-Methanocyclopentapyrazole](https://pubchem.ncbi.nlm.nih.gov/compound/564375) | 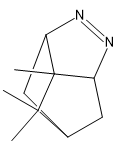 | Soluble | High | Yes | 0.55 | 4.46 |
| 33 | [562380](https://pubchem.ncbi.nlm.nih.gov/compound/562380) | [1,4-Methano-1H-Cyclopenta[D]Pyridazine](https://pubchem.ncbi.nlm.nih.gov/compound/562380) | 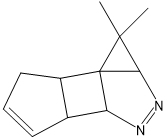 | Soluble | High | Yes | 0.55 | 5.09 |
| 34 | [80790](https://pubchem.ncbi.nlm.nih.gov/compound/80790) | [Carvacrol Methyl Ether](https://pubchem.ncbi.nlm.nih.gov/compound/80790) | 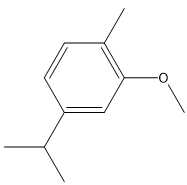 | Soluble | High | Yes | 0.55 | 1.19 |
| 35 | [643779](https://pubchem.ncbi.nlm.nih.gov/compound/643779) | Neral | 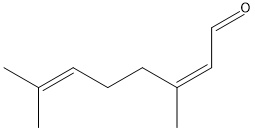 | Soluble | High | Yes | 0.55 | 2.49 |
| 36 | [527143](https://pubchem.ncbi.nlm.nih.gov/compound/527143) | [Menthadienol](https://pubchem.ncbi.nlm.nih.gov/compound/527143) | 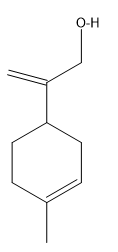 | Soluble | High | Yes | 0.55 | 3.25 |
| 37 | [6989](https://pubchem.ncbi.nlm.nih.gov/compound/6989) | Thymol | 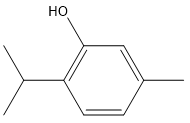 | Soluble | High | Yes | 0.55 | 1.00 |
| 38 | [10364](https://pubchem.ncbi.nlm.nih.gov/compound/10364) | Carvacrol | 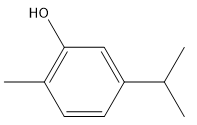 | Soluble | High | Yes | 0.55 | 1.00 |
| 39 | [68252](https://pubchem.ncbi.nlm.nih.gov/compound/68252) | [Thymol Acetate](https://pubchem.ncbi.nlm.nih.gov/compound/68252) | 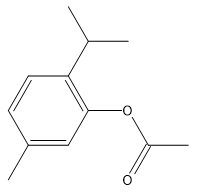 | Soluble | High | Yes | 0.55 | 1.72 |
| 40 | [80792](https://pubchem.ncbi.nlm.nih.gov/compound/80792) | [Carvacryl Acetate](https://pubchem.ncbi.nlm.nih.gov/compound/80792) | 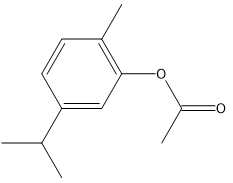 | Soluble | High | Yes | 0.55 | 1.69 |
| 41 | [56927990](https://pubchem.ncbi.nlm.nih.gov/compound/56927990) | [7-Epi-Sesquithujene](https://pubchem.ncbi.nlm.nih.gov/compound/56927990) | 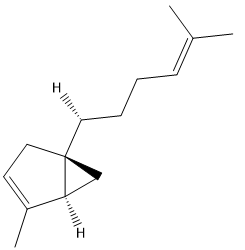 | Soluble | Low | No | 0.55 | 4.32 |
| 42 | [324224](https://pubchem.ncbi.nlm.nih.gov/compound/324224) | [Beta-Bourbonene](https://pubchem.ncbi.nlm.nih.gov/compound/324224) | 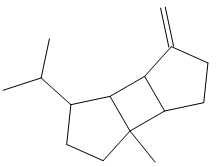 | Moderately soluble | Low | Yes | 0.55 | 3.94 |
| 43 | [5281515](https://pubchem.ncbi.nlm.nih.gov/compound/5281515) | [BETA-CARYOPHYLLENE](https://pubchem.ncbi.nlm.nih.gov/compound/5281515) | 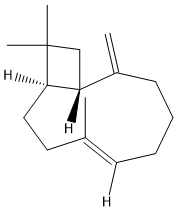 | Moderately soluble | Low | No | 0.55 | 4.49 |
| 44 |  | [Beta-Gurjunene](https://pubchem.ncbi.nlm.nih.gov/compound/6450812) | 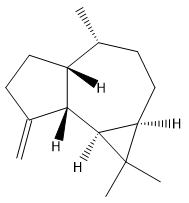 | Moderately soluble | Low | Yes | 0.55 | 3.70 |
| 45 | [6429302](https://pubchem.ncbi.nlm.nih.gov/compound/6429302) | [Trans-Alpha-Bergamotene](https://pubchem.ncbi.nlm.nih.gov/compound/6429302) | 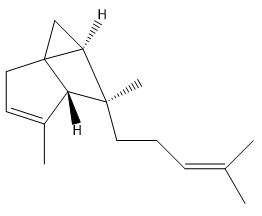 | Soluble | Low | No | 0.55 | 5.40 |
| 46 | [91746537](https://pubchem.ncbi.nlm.nih.gov/compound/91746537) | [Alloaromadendrene](https://pubchem.ncbi.nlm.nih.gov/compound/91746537) | 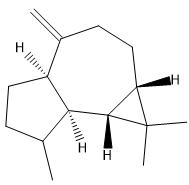 | Moderately soluble | Low | Yes | 0.55 | 3.70 |
| 47 | [564375](https://pubchem.ncbi.nlm.nih.gov/compound/564375) | [3,5-Methanocyclopentapyrazole](https://pubchem.ncbi.nlm.nih.gov/compound/564375) | 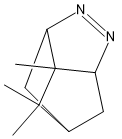 | Soluble | High | Yes | 0.55 | 4.46 |
| 48 | [132350838](https://pubchem.ncbi.nlm.nih.gov/compound/132350838) | Germacrene D | 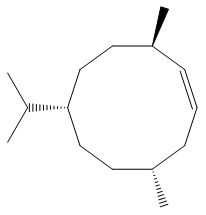 | Poorly soluble | Low | No | 0.55 | 4.44 |
| 49 | [12313019](https://pubchem.ncbi.nlm.nih.gov/compound/12313019) | [Gamma-Amorphene](https://pubchem.ncbi.nlm.nih.gov/compound/12313019) | 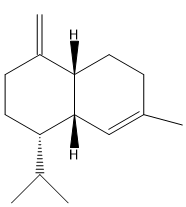 | Soluble | Low | No | 0.55 | 4.35 |
| 50 | [87203412](https://pubchem.ncbi.nlm.nih.gov/compound/87203412) | Nerylisobutanoate | 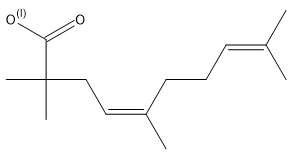 | Soluble | High | Yes | 0.85 | 2.95 |
| 51 | [10910653](https://pubchem.ncbi.nlm.nih.gov/compound/10910653) | [Ledene](https://pubchem.ncbi.nlm.nih.gov/compound/10910653) | 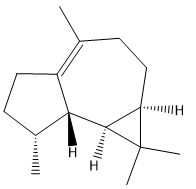 | Soluble | Low | No | 0.55 | 4.45 |
| 52 | [12473722](https://pubchem.ncbi.nlm.nih.gov/compound/12473722) | Geranylisobutanoate | 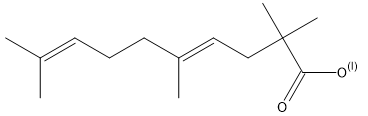 | Soluble | High | Yes | 0.85 | 2.95 |
| 53 | [519764](https://pubchem.ncbi.nlm.nih.gov/compound/519764) | [Sesquiphellandrene](https://pubchem.ncbi.nlm.nih.gov/compound/519764) | 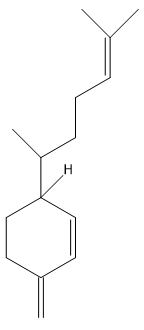 | Moderately soluble | Low | No | 0.55 | 4.42 |
| 54 | [14475467](https://pubchem.ncbi.nlm.nih.gov/compound/14475467) | [Beta-Vetivenene](https://pubchem.ncbi.nlm.nih.gov/compound/14475467) | 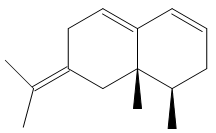 | Soluble | Low | No | 0.55 | 4.44 |
| 55 | [181580](https://pubchem.ncbi.nlm.nih.gov/compound/181580) | [Beta-Atlantone](https://pubchem.ncbi.nlm.nih.gov/compound/181580) | 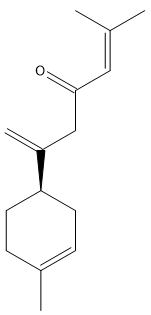 | Moderately soluble | High | Yes | 0.55 | 3.73 |
| 56 | [12592](https://pubchem.ncbi.nlm.nih.gov/compound/12592) | N-tetracosene | 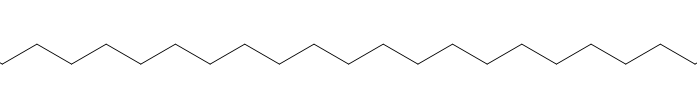 | Poorly soluble | Low | No | 0.55 | 3.20 |

**Supplementary Table 2: *In Silico* prediction of the toxicity of potential SARS-CoV-2 main protease inhibitors from *Thymus schimperi***

| **No** | **Compound CID** | **Common name** | **In silico toxicity** | | | | | | |
| --- | --- | --- | --- | --- | --- | --- | --- | --- | --- |
| **LD50**  **(mg/kg)** | **Toxicity class** | **Hepatotoxicity** | **Carcinogenicity** | **Immunotoxicity** | **Mutagenicity** | **Cytotoxicity** |
| 1 | [13357](https://pubchem.ncbi.nlm.nih.gov/compound/13357) | Butanoic acid | 5000 | 5 | No | No | No | No | No |
| 2 | [17868](https://pubchem.ncbi.nlm.nih.gov/compound/17868) | Thujene alpha | 5000 | 5 | No | No | No | No | No |
| 3 | [123737810](https://pubchem.ncbi.nlm.nih.gov/compound/123737810) | Pinene alpha | 4800 | 5 | No | No | No | No | No |
| 4 | [561243](https://pubchem.ncbi.nlm.nih.gov/compound/561243) | 7-Ethylcycloheptatriene | 175 | 3 | No | No | No | No | No |
| 5 | 6616 | Camphene | 5000 | 5 | No | No | No | No | No |
| 6 | [123730774](https://pubchem.ncbi.nlm.nih.gov/compound/123730774) | Pinene beta | 5000 | 5 | No | Little | No | No | Little |
| 7 | [137888](https://pubchem.ncbi.nlm.nih.gov/compound/137888) | Flourazophore P | 334 | 4 | Little | Yes | No | Little | No |
| 8 | [12473722](https://pubchem.ncbi.nlm.nih.gov/compound/12473722) | 3-Octane | 4260 | 5 | Yes | No | No | No | No |
| 9 | [31253](https://pubchem.ncbi.nlm.nih.gov/compound/31253) | [Myrcene](https://pubchem.ncbi.nlm.nih.gov/compound/31253) | 5000 | 5 | No | Little | No | No | No |
| 10 | [7460](https://pubchem.ncbi.nlm.nih.gov/compound/7460) | [Alpha-phellandrene](https://pubchem.ncbi.nlm.nih.gov/compound/7460) | 5700 | 6 | No | No | No | No | No |
| 11 | [26049](https://pubchem.ncbi.nlm.nih.gov/compound/26049) | 3-Carene | 4800 | 5 | No | No | No | No | No |
| 12 | [10703](https://pubchem.ncbi.nlm.nih.gov/compound/10703) | [O-Cymene](https://pubchem.ncbi.nlm.nih.gov/compound/10703) | 1370 | 4 | No | Yes | No | No | No |
| 13 | [22311](https://pubchem.ncbi.nlm.nih.gov/compound/22311) | [Limonene](https://pubchem.ncbi.nlm.nih.gov/compound/22311) | 4400 | 5 | No | No | No | No | No |
| 14 | [2758](https://pubchem.ncbi.nlm.nih.gov/compound/2758) | Eucalyptol | 2480 | 5 | No | No | No | No | No |
| 15 | [142246827](https://pubchem.ncbi.nlm.nih.gov/compound/142246827) | Ocimene (Z) | 113 | 3 | No | Yes | No | No | No |
| 16 | [7462](https://pubchem.ncbi.nlm.nih.gov/compound/7462) | [Alpha-Terpinene](https://pubchem.ncbi.nlm.nih.gov/compound/7462) | 1680 | 4 | No | No | No | No | No |
| 17 | [7461](https://pubchem.ncbi.nlm.nih.gov/compound/7461) | [Gamma-Terpinene](https://pubchem.ncbi.nlm.nih.gov/compound/7462) | 2500 | 5 | No | No | No | No | No |
| 18 | [10975](https://pubchem.ncbi.nlm.nih.gov/compound/10975) | [Myrcenol](https://pubchem.ncbi.nlm.nih.gov/compound/10975) | 5300 | 6 | No | No | No | No | No |
| 19 | [11463](https://pubchem.ncbi.nlm.nih.gov/compound/11463) | Terpinolene | 4390 | 5 | No | No | No | No | No |
| 20 | [6549](https://pubchem.ncbi.nlm.nih.gov/compound/6549) | [Linalool](https://pubchem.ncbi.nlm.nih.gov/compound/6549) | 2200 | 5 | No | No | No | No | No |
| 21 | [527426](https://pubchem.ncbi.nlm.nih.gov/compound/527426) | [Dehydrosabinaketone](https://pubchem.ncbi.nlm.nih.gov/compound/527426) | 1450 | 4 | No | Yes | No | No | No |
| 22 | [1252759](https://pubchem.ncbi.nlm.nih.gov/compound/1252759) | [Alpha-Campholenal](https://pubchem.ncbi.nlm.nih.gov/compound/1252759) | 5000 | 5 | No | No | No | No | No |
| 23 | [5368821](https://pubchem.ncbi.nlm.nih.gov/compound/5368821) | [Alloocimene](https://pubchem.ncbi.nlm.nih.gov/compound/5368821) | 1900 | 4 | No | Yes | No | No | No |
| 24 | [45095936](https://pubchem.ncbi.nlm.nih.gov/compound/45095936) | Sabinol trans | 3000 | 5 | No | No | No | No | No |
| 25 | [64685](https://pubchem.ncbi.nlm.nih.gov/compound/64685) | [Isoborneol](https://pubchem.ncbi.nlm.nih.gov/compound/64685) | 500 | 4 | No | No | No | No | No |
| 26 | [110952](https://pubchem.ncbi.nlm.nih.gov/compound/110952) | [1-(3-Methylphenyl)Ethanol](https://pubchem.ncbi.nlm.nih.gov/compound/110952) | 1300 | 4 | No | No | No | No | No |
| 27 | [442501](https://pubchem.ncbi.nlm.nih.gov/compound/442501) | [(+)-Alpha-Terpineol](https://pubchem.ncbi.nlm.nih.gov/compound/442501) | 2830 | 5 | No | No | No | No | No |
| 28 | [556287](https://pubchem.ncbi.nlm.nih.gov/compound/556287) | [Cyclohexane](https://pubchem.ncbi.nlm.nih.gov/compound/556287) | 5000 | 5 | No | Yes | No | No | No |
| 29 | [573025](https://pubchem.ncbi.nlm.nih.gov/compound/573025) | [2-Isobutylideneamino-3-Methylbutyronitrile](https://pubchem.ncbi.nlm.nih.gov/compound/573025) | 120 | 3 | No | No | No | No | No |
| 30 | [8182](https://pubchem.ncbi.nlm.nih.gov/compound/8182) | dodecane | 750 | 3 | No | No | No | No | No |
| 31 | [443183](https://pubchem.ncbi.nlm.nih.gov/compound/443183) | (1S,4S)-Dihydrocarvone | 5000 | 5 | No | No | No | No | No |
| 32 | [564375](https://pubchem.ncbi.nlm.nih.gov/compound/564375) | [3,5-Methanocyclopentapyrazole](https://pubchem.ncbi.nlm.nih.gov/compound/564375) | 880 | 4 | No | Yes | No | No | No |
| 33 | [562380](https://pubchem.ncbi.nlm.nih.gov/compound/562380) | [1,4-Methano-1H-Cyclopenta[D]Pyridazine](https://pubchem.ncbi.nlm.nih.gov/compound/562380) | 260 | 3 | No | Yes | No | No | No |
| 34 | [80790](https://pubchem.ncbi.nlm.nih.gov/compound/80790) | [Carvacrol Methyl Ether](https://pubchem.ncbi.nlm.nih.gov/compound/80790) | 880 | 4 | No | Yes | No | No | No |
| 35 | [643779](https://pubchem.ncbi.nlm.nih.gov/compound/643779) | Neral | 500 | 4 | No | No | No | No | No |
| 36 | [527143](https://pubchem.ncbi.nlm.nih.gov/compound/527143) | [Menthadienol](https://pubchem.ncbi.nlm.nih.gov/compound/527143) | 3000 | 5 | No | No | No | No | No |
| 37 | [6989](https://pubchem.ncbi.nlm.nih.gov/compound/6989) | Thymol | 640 | 4 | No | No | No | No | No |
| 38 | [10364](https://pubchem.ncbi.nlm.nih.gov/compound/10364) | Carvacrol | 810 | 4 | No | No | No | No | No |
| 39 | [68252](https://pubchem.ncbi.nlm.nih.gov/compound/68252) | [Thymol Acetate](https://pubchem.ncbi.nlm.nih.gov/compound/68252) | 2000 | 4 | Yes | No | No | No | No |
| 40 | [80792](https://pubchem.ncbi.nlm.nih.gov/compound/80792) | [Carvacryl Acetate](https://pubchem.ncbi.nlm.nih.gov/compound/80792) | 374 | 4 | Yes | No | No | No | No |
| 41 | [56927990](https://pubchem.ncbi.nlm.nih.gov/compound/56927990) | [7-Epi-Sesquithujene](https://pubchem.ncbi.nlm.nih.gov/compound/56927990) | 5000 | 5 | No | No | No | No | No |
| 42 | [324224](https://pubchem.ncbi.nlm.nih.gov/compound/324224) | [Beta-Bourbonene](https://pubchem.ncbi.nlm.nih.gov/compound/324224) | 5000 | 5 | No | No | Yes | No | No |
| 43 | [5281515](https://pubchem.ncbi.nlm.nih.gov/compound/5281515) | [Beta-caryophyllene](https://pubchem.ncbi.nlm.nih.gov/compound/5281515) | 3700 | 5 | No | No | No | No | No |
| 44 |  | [Beta-Gurjunene](https://pubchem.ncbi.nlm.nih.gov/compound/6450812) | 5000 | 5 | No | No | No | No | No |
| 45 | [6429302](https://pubchem.ncbi.nlm.nih.gov/compound/6429302) | [Trans-Alpha-Bergamotene](https://pubchem.ncbi.nlm.nih.gov/compound/6429302) | 4800 | 5 | No | No | No | No | No |
| 46 | [91746537](https://pubchem.ncbi.nlm.nih.gov/compound/91746537) | [Alloaromadendrene](https://pubchem.ncbi.nlm.nih.gov/compound/91746537) | 5000 | 5 | No | No | No | No | No |
| 47 | [564375](https://pubchem.ncbi.nlm.nih.gov/compound/564375) | [3,5-Methanocyclopentapyrazole](https://pubchem.ncbi.nlm.nih.gov/compound/564375) | 880 | 4 | No | Yes | No | No | No |
| 48 | [132350838](https://pubchem.ncbi.nlm.nih.gov/compound/132350838) | Germacrene D | 2760 | 5 | No | No | No | No | No |
| 49 | [12313019](https://pubchem.ncbi.nlm.nih.gov/compound/12313019) | [Gamma-Amorphene](https://pubchem.ncbi.nlm.nih.gov/compound/12313019) | 4400 | 5 | No | No | Yes | No | No |
| 50 | [87203412](https://pubchem.ncbi.nlm.nih.gov/compound/87203412) | Nerylisobutanoate | 4260 | 5 | Yes | No | No | No | No |
| 51 | [10910653](https://pubchem.ncbi.nlm.nih.gov/compound/10910653) | [Ledene](https://pubchem.ncbi.nlm.nih.gov/compound/10910653) | 5000 | 5 | No | No | No | No | No |
| 52 | [12473722](https://pubchem.ncbi.nlm.nih.gov/compound/12473722) | Geranylisobutanoate | 4260 | 5 | Yes | No | No | No | No |
| 53 | [519764](https://pubchem.ncbi.nlm.nih.gov/compound/519764) | [Sesquiphellandrene](https://pubchem.ncbi.nlm.nih.gov/compound/519764) | 5000 | 5 | No | No | No | No | No |
| 54 | [14475467](https://pubchem.ncbi.nlm.nih.gov/compound/14475467) | [Beta-Vetivenene](https://pubchem.ncbi.nlm.nih.gov/compound/14475467) | 3040 | 5 | No | No | No | No | No |
| 55 | [181580](https://pubchem.ncbi.nlm.nih.gov/compound/181580) | [Beta-Atlantone](https://pubchem.ncbi.nlm.nih.gov/compound/181580) | 1640 | 4 | No | No | No | No | No |
| 56 | [12592](https://pubchem.ncbi.nlm.nih.gov/compound/12592) | N-tetracosene | 750 | 3 | No | No | No | No | No |

**Toxicity key:** Class I: fatal if swallowed (LD50 ≤ 5), Class II: fatal if swallowed (5 < LD50 ≤ 50)**,** Class III: toxic if swallowed (50 < LD50 ≤ 300)**,** Class IV: harmful if swallowed (300 < LD50 ≤ 2000)**,** Class V: may be harmful if swallowed (2000 < LD50 ≤ 5000)**,** Class VI: non-toxic (LD50 > 5000)


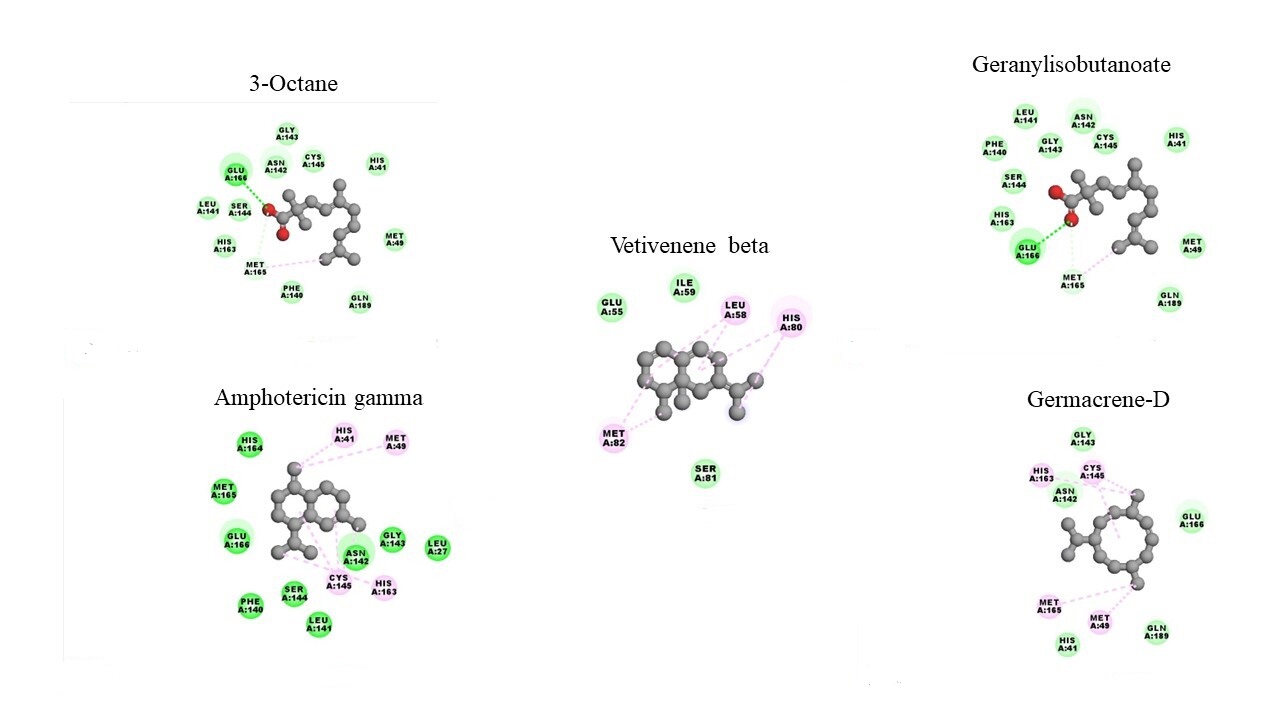


**Supplementary Figure 1: Interaction of top hits with amino acids in the substrate binding pocket of SARS-CoV-2 Mpro.** The ligands showed interaction in the pocket via conventional hydrogen bonds (green) van der Waals interactions (light green), carbon hydrogen bonds (gray) and alkyl interactions (pink).


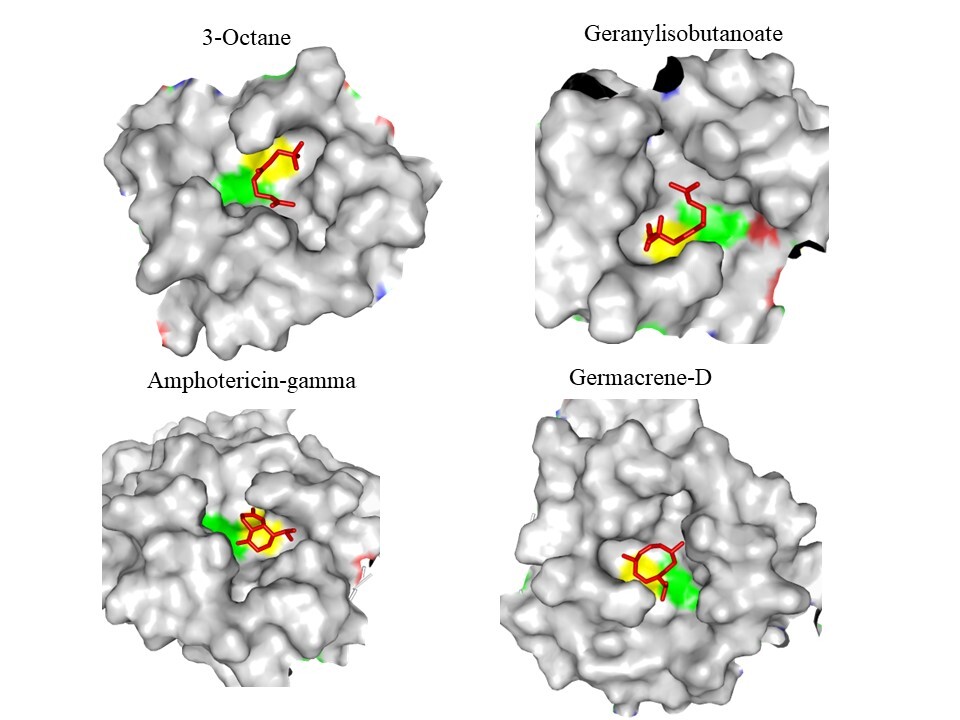


**Supplementary Figure 2: Docking of top hits in the catalytic dyad of SARS-CoV-2 Mpro.** Residues in the catalytic dyad: His41 is highlighted green and Cys145 is highlighted yellow.
